# Supplementary material for: The Effect of Internalized Paramagnetic Nanoparticles on Caenorhabditis elegans Locomotion in the Presence of Magnetic Field
Source: Hindawi journal article supplement (doi:10.1155/2023/1634691), 2023-06-10
Supplement: f1 [file 1634691.f1.docx]

**Supplementary Information**

The features of the magnetic field (MF) presented here are independent of the magnetic particles and depend only on the properties of the electromagnets and the geometry of the setup. However, the forces that are exerted on the particles depend also on the properties of the particle. We have used several different magnetic particles in our experiments. The numerical simulations and analysis are performed only on the largest magnetic particles since such analysis provide us with the largest forces that can be created because of the external MF. Moreover, the characteristics of Dynabeads are more accessible 1 compared to the rest of the particles used in our experiments.

The forces on a magnetic particle in an external MF can be characterized as2:

,

where are the density, volume, initial magnetization, and initial magnetic susceptibility of the particles, respectively. is the force acting on the particle, is the external MF, and is the permeability of vacuum.

Equation is used with the properties of the magnetic particles 1 and the simulation results from COMSOL Multiphysics for the external MF to calculate the forces acting on the magnetic particles. Figure 2 shows that the magnitude of the force at all locations on the plate, which, as expected, can be observed to be larger near the electromagnets where the MF and its gradient are larger.

The magnetization of the particles creates local modifications to the MF compared to the externally applied MF. From classical physics, the MF around a magnetic dipole can be expressed as:

,

where is position vector relative to the particle at which the MF is calculated and is the magnetic moment of the particle that can be calculated as 2:

.

Equation is used with the properties of the largest particles in our experiments 1 along with the external MF () created by the electromagnets obtained from COMSOL Multyphysics to determine the magnetic moments of the particles in the presence of the external MF. Next Eq. is used to calculate the MF around the particles when the magnetic moment is known. Figure 3 shows the magnitude of the MF flux for vertical and horizontal configuration of three magnetic particles using Eqs. and in MATLAB. The MF is strong close to the particles for both configurations, and decays rapidly with distance from the particles.

The MF shown in Figure 3 can also be used to calculate the gradient of the MF around the particles. Figure 3 show the gradient of the magnetic of for both horizontal and vertical configuration. Again, the gradient of the MF is strongest near the particles and decays rapidly with distance from the particles.

Finally, the forces between two magnetic particles can be found as (3):

where is the force between the two particles, is the distance between the two particles, is the unit vector that connects the two particles , and  are the direction of the magnetic moment for particle 1 and 2, and is the magnitude of the magnetic moment of the two particles. Here, we have assumed that the distance between the two particles is small leading to the same magnetic moment for both particles based on Eq. . Figure 3E shows how the force between two particles changes for both vertical and horizontal direction. The force between the particles in the horizontal direction is repulsive while the force between the particles in the vertical direction is attractive. The attractive forces between the particles cause them to form chain-like structures when they are not interrupted by the medium in which the particles are located 57, 58.

**References**

1. G. Fonnum, C. Johansson, A. Molteberg, S. Mørup, E. Aksnes, **2005**. Characterisation of Dynabeads® by magnetization measurements and Mössbauer spectroscopy, Journal of Magnetism and Magnetic Materials, 293 41-47.

2. S.S. Shevkoplyas, A.C. Siegel, R.M. Westervelt, M.G. Prentiss, G.M. Whitesides, **2007**. The force acting on a superparamagnetic bead due to an applied magnetic field, Lab Chip, 7 1294-1302.

**Figure S1**: Calibration of the parameters in COMSOL Multiphysics simulations to match the available data for magnet 1 (A) and magnet 2 (B) that are used in the experiments.


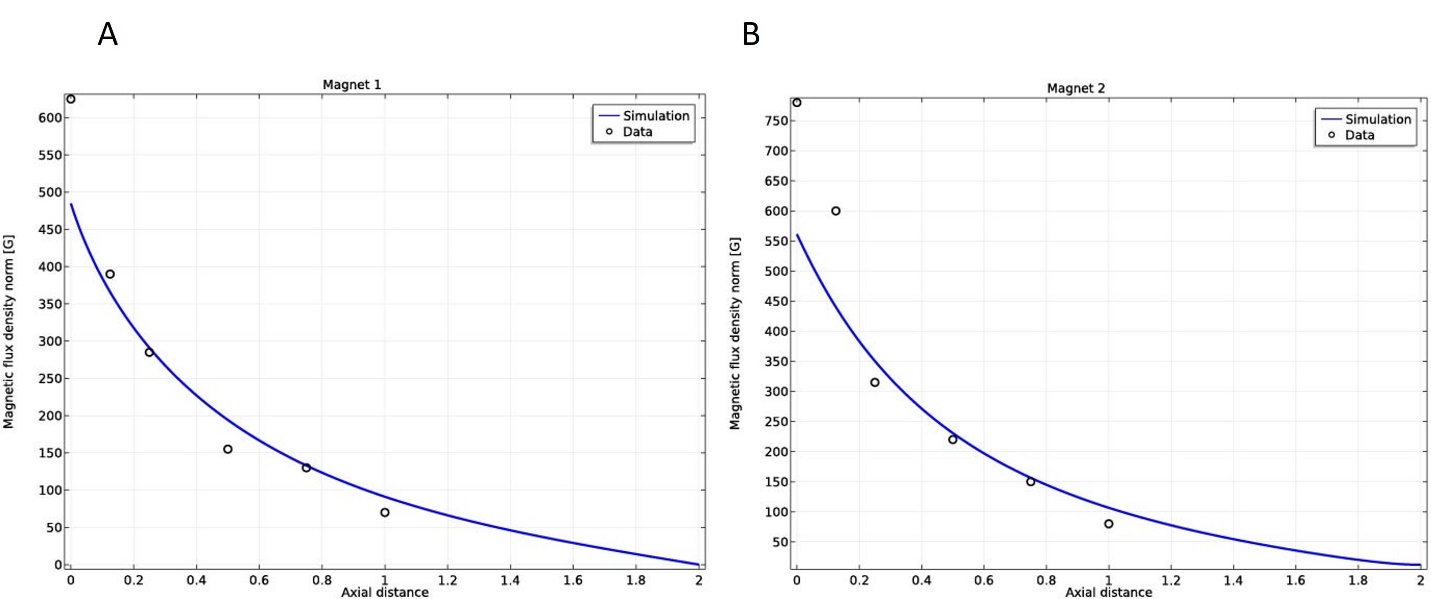


**Figure S2**: All the components of the gradient of the magnetic field for the particles in the vertical (along the y axis) and horizontal (along the x axis) configuration.

**
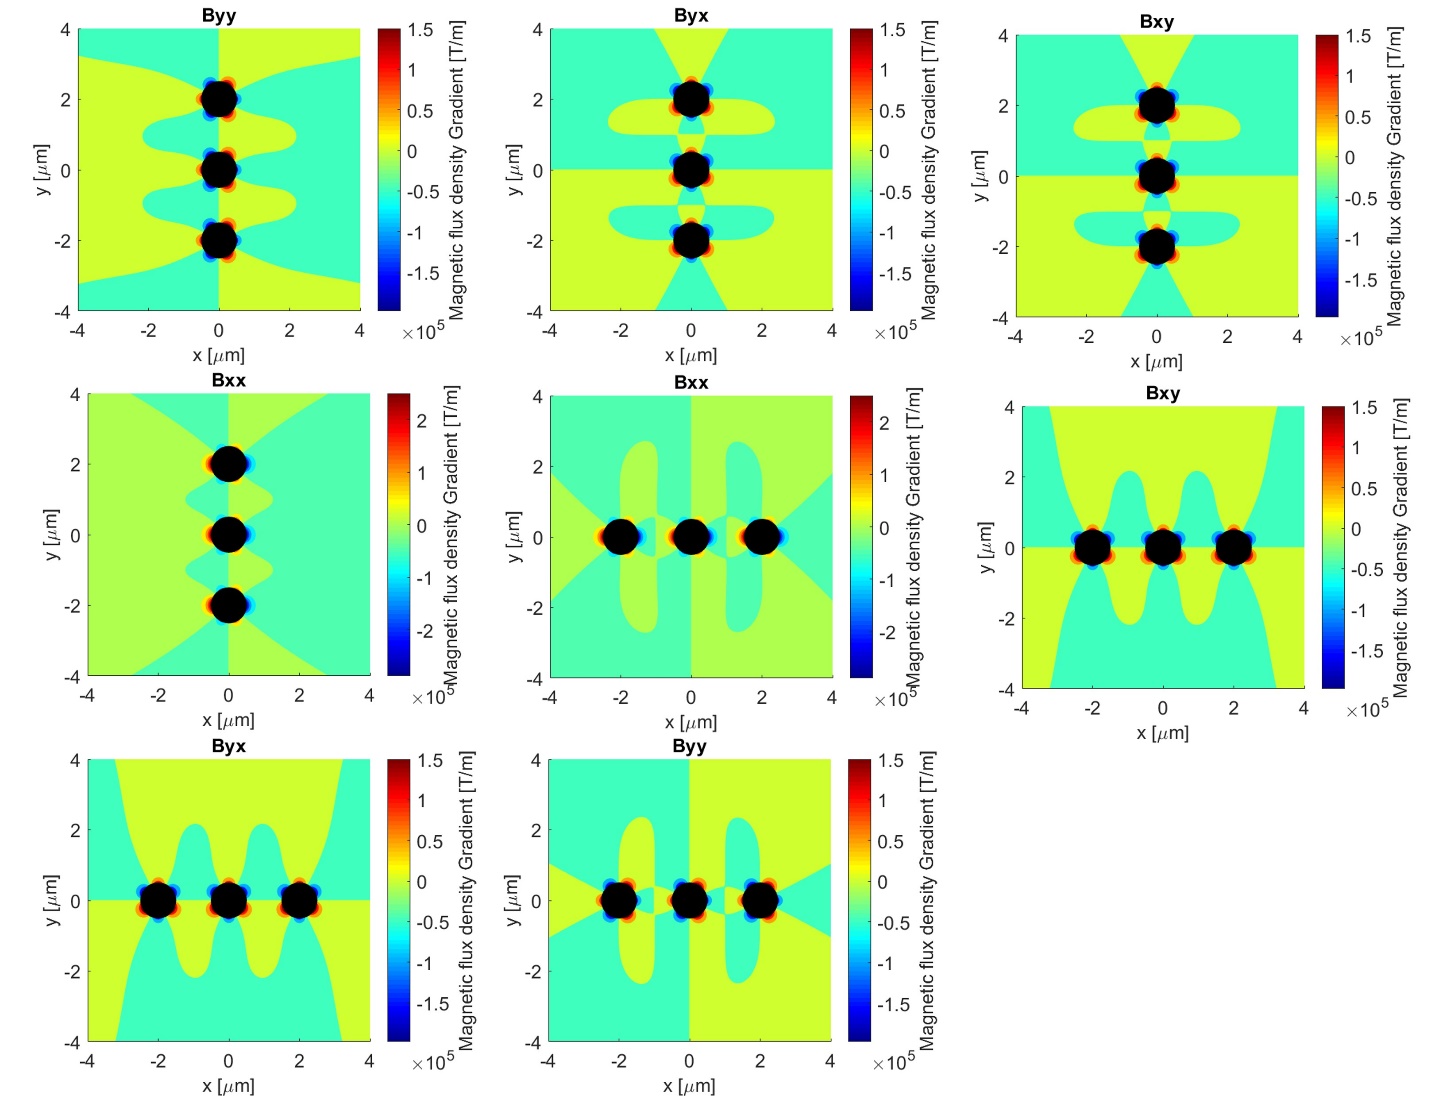
**

**Figure S3**: **A**) An overview of the steps that are taken to analyze the locomotion of the worms. Top to bottom: A worm is selected in the first frame to be tracked. Next, several image enhancements are performed on the subframe that is created around the selected worm. Next, the grayscale image is converted to a binary image and postprocessing, e.g., finding the centroid (blue circle) of the worm, is performed. All these steps are conducted for the whole movie that is recorded. Finally, the data collected from all experiments are compared. **B**) The supplementary angle (α) is the difference in tangent angles at each skeleton point.

**
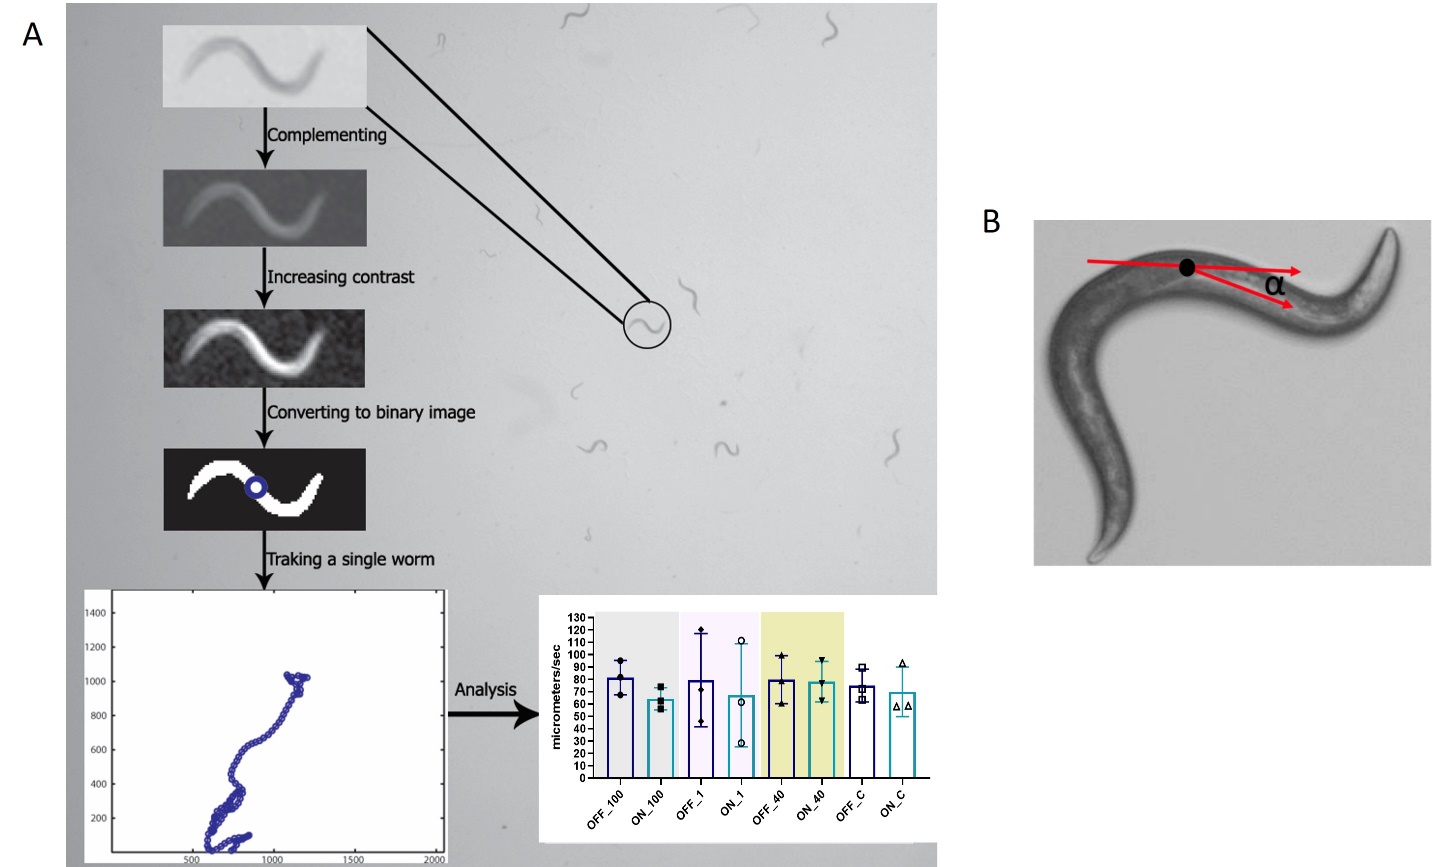
**

**Figure S4**: Comparison of particle-fed nematodes with untreated nematodes, for all locomotion features, in the absence of magnetic field (OFF). Each graph presents combined data for all 3 experiments for each worm group, for one locomotion feature. **A**) bend count, **B**) forward/backward ratio, **C**) stay ratio, **D**) , **E**) , **F**) , **G**) path curvature, **H**) range. Grey area: group 100 (100 nΜ particles), pink area: Group 1 (1μm particles), lime area: Group 40 (40 nm particles), no shade: Control group (untreated animals). As shown in Fig. S5, no effect of any particle alone without the presence of MF was detected by one-way ANOVA, compared to the control group.

**
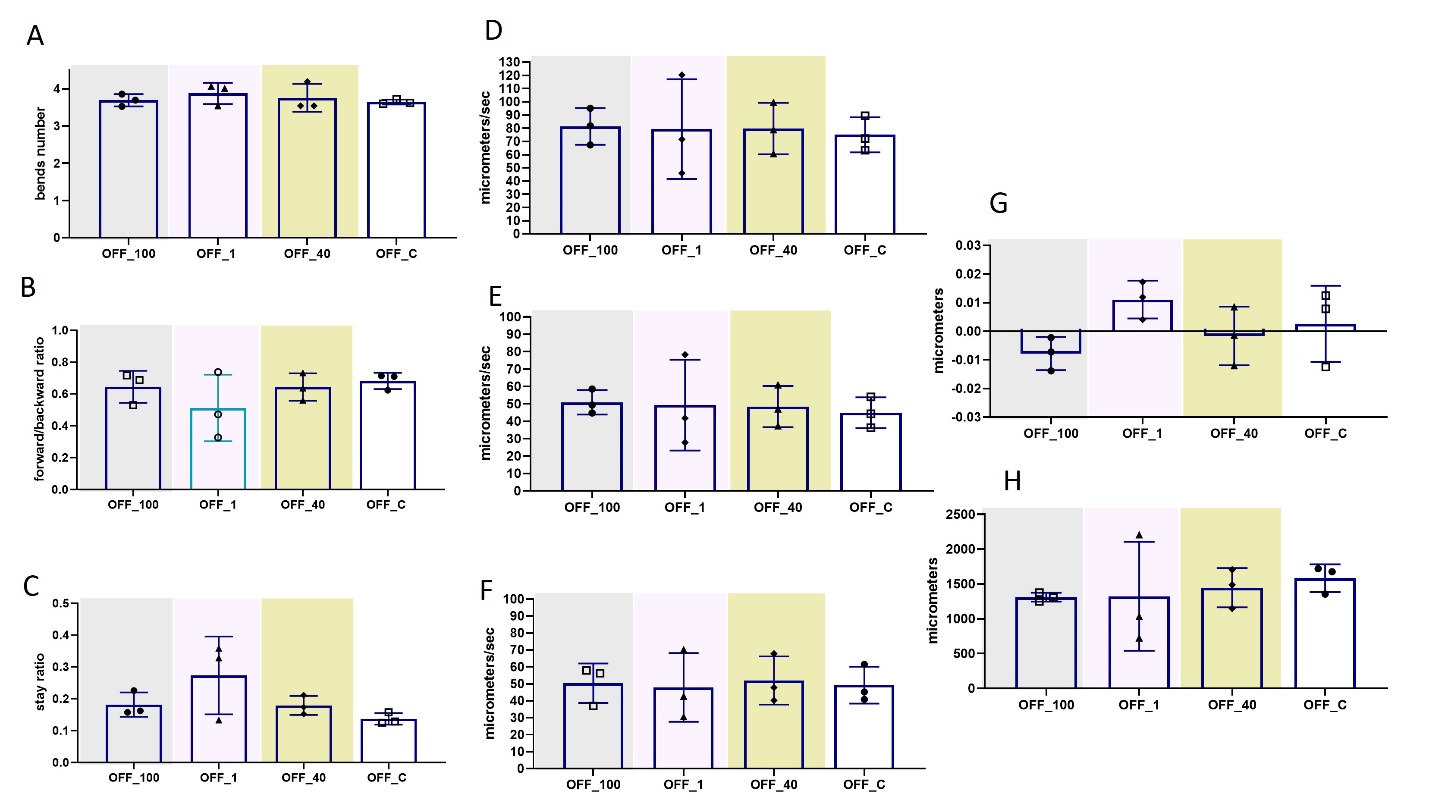
**

**Figure S5**: One-way ANOVA for the comparisons between all three groups of particle-fed animals against untreated (control) group, for the OFF state. OFF state for each of the 3 groups was compared against the control, for each locomotion feature. See also Figure S4.

**
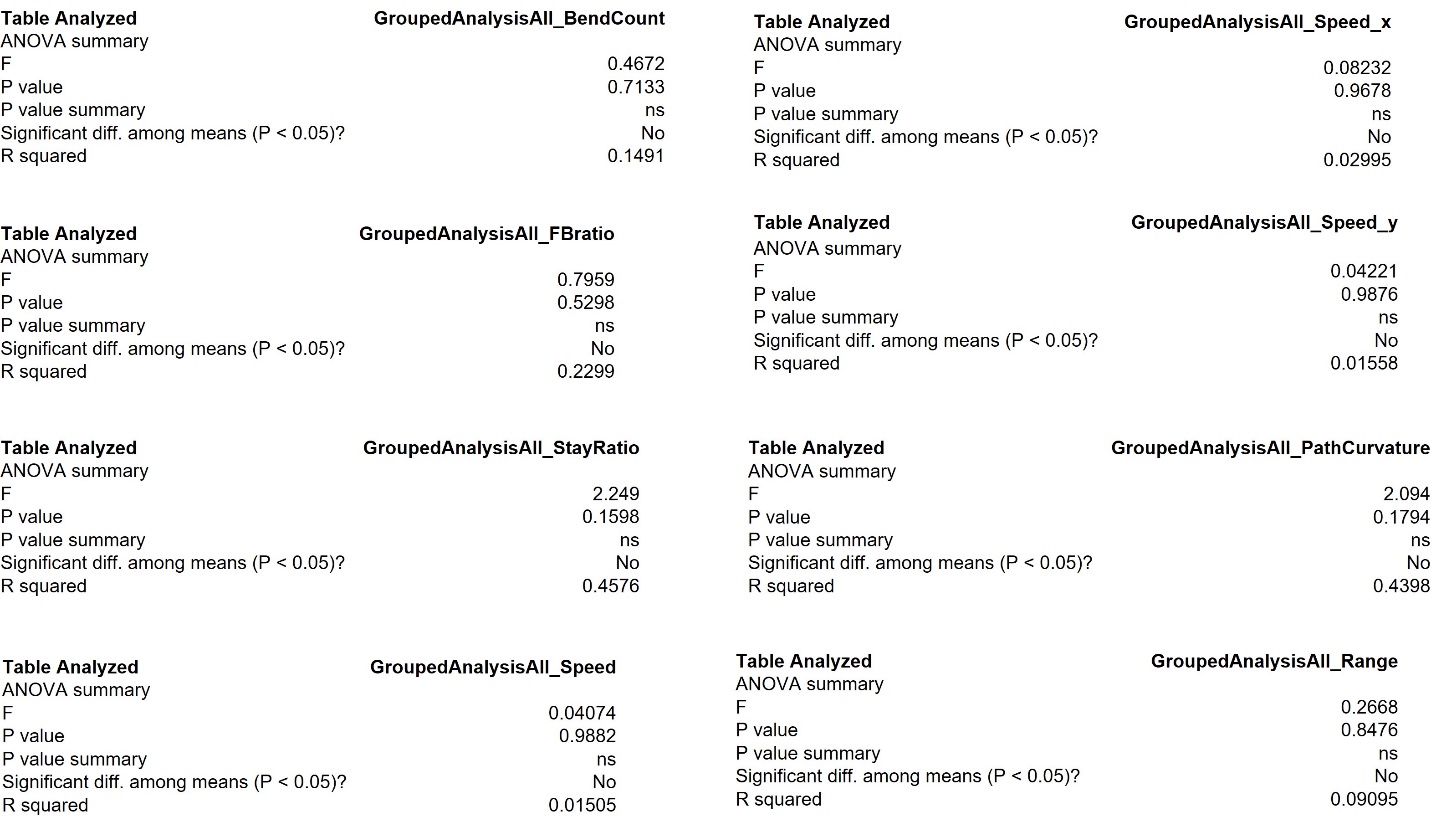
**

**Figure S6**: Power analysis for locomotion dynamics experiments. G*Power open-source software was used as described in Methods. **A)**. Plot that shows the probability of detecting a real effect with regard to sample size; **B)**. Table showing the protocol followed for the power analysis. The mean of group1 was set to 0.5 and the mean of group2 was set to 0.4, with SD within each group σ=0.1.

**
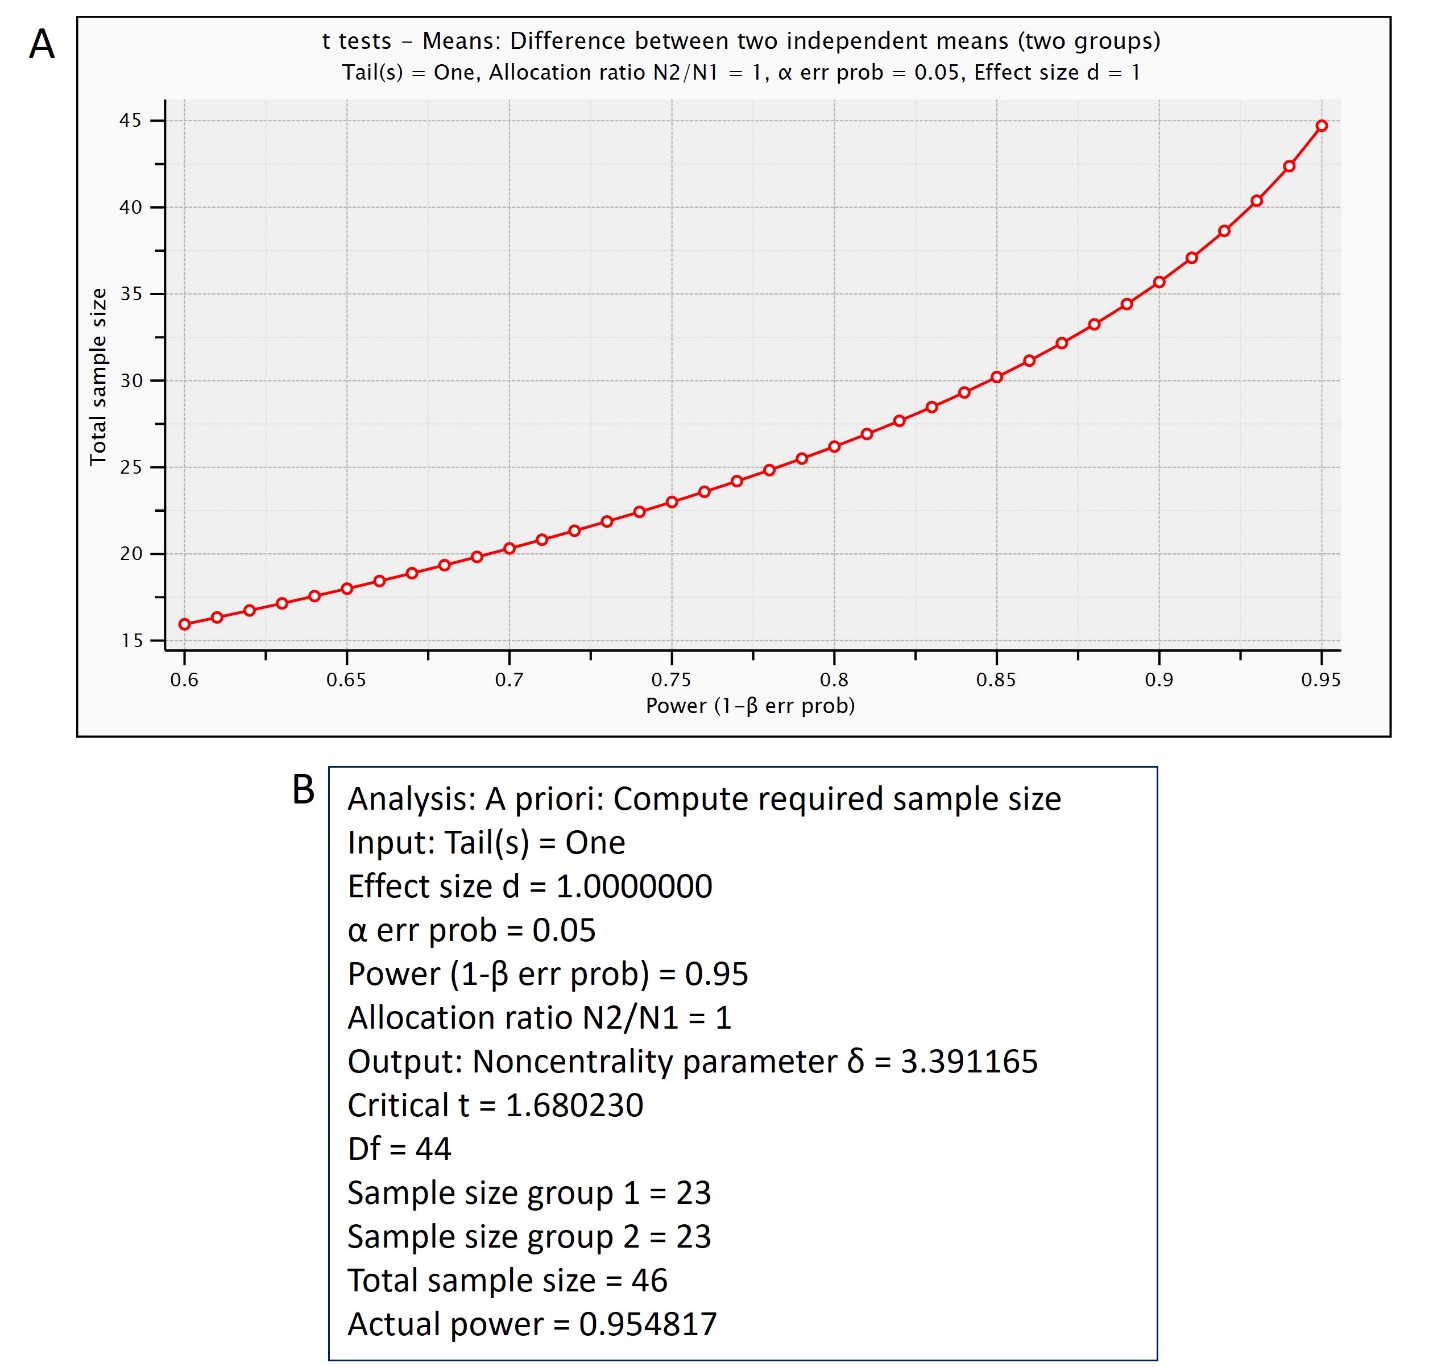
**
